1 **Title: Evaluating artesunate-amodiaquine deployment, efficacy and safety: an *in silico***  
2 **pharmacological model.**

3

4 Ki Bae Hong<sup>1 †‡</sup>

5 Email: kibaehong78@gmail.com

6

7 Ian Hastings<sup>1</sup>

8 Email: Ian.Hastings@lstmed.ac.uk

9

10 Katherine Kay<sup>1§\*</sup>

11 Email: KKay2@buffalo.edu

12

13 Eva Maria Hodel<sup>1\*</sup>

14 Email: EvaMaria.Hodel@lstmed.ac.uk

15

16 \* Equal contribution

17 ‡ Corresponding author

18 <sup>1</sup> Liverpool School of Tropical Medicine, Liverpool, United Kingdom

19 <sup>†</sup> Current affiliation: Sindosi Ejin Pediatrics Hospital, Jangjae-ri 1789, Baebang-eup, Asan-si,

20 Chungcheongnam-do, Republic of Korea

21 <sup>§</sup> Current affiliation: University at Buffalo State University of New York, Buffalo, New York,

22 USA

23 **Abstract**

24

25 **Background:** The World Health Organization currently recommends artesunate-amodiaquine  
26 (AS-AQ) as a first-line treatment for uncomplicated falciparum malaria. The clinical efficacy of  
27 AS-AQ is very high but its effectiveness in the field varies considerably. This study aimed at  
28 comparing the efficacy, effectiveness and safety of AS-AQ fixed dose combination (FDC) and  
29 non-fixed formulation (non-FDC) in controlled and real-life settings using a pharmacological  
30 model of antimalarial treatment.

31 **Methods:** The effectiveness and safety of different drug formulations in different treatment  
32 scenarios were investigated using a pharmacological model of AS-AQ treatment. The model  
33 simulated multiple treatment scenarios to assess the effects of age- or weight-based dosing bands  
34 in three geographically distinct patient populations, and poor patient adherence.

35 **Results:** The model output was consistent with clinical trials in terms of cure rates,  
36 recrudescence rates and the pattern of AQ overdosing with age- and weight-based dosing  
37 regimens. AS-AQ treatment has good efficacy and effectiveness in fully adherent patients but  
38 monotherapy of AS or AQ lead to treatment failure. The weight-based dosing regimen with FDC  
39 was the best option for patients in terms of drug safety and had similar efficacies to the other  
40 regimens. Asians were more likely to be overdosed with AQ when using age-based dosing  
41 regimens.

42 **Conclusions:** Weight-based dosing is optimal but not always feasible, so age-based dosing  
43 regimens are often used as an alternative. The model outputs highlight the importance of  
44 optimising these age-based dosing regimens for specific regions, and identify an increased risk of  
45 overdosing in young children.

46

47 Max. word count 350; current 245

48

49 **Keywords:** Malaria, falciparum, antimalarials, amodiaquine, artemisinin, computer simulation,  
50 treatment outcome, patient compliance, pharmacology, pharmacokinetics

51

## 52 **Introduction**

53

54 The World Health Organization (WHO) estimated there were approximately 198 million cases of  
55 malaria and 584,000 deaths in 2013 (1). Due to the emergence of chloroquine (CQ), mefloquine  
56 (MQ) and sulphadoxine-pyrimethamine (SP) resistance in malaria endemic regions, treatment  
57 policy from WHO has been recommending artemisinin-based combination therapy (ACT) as a  
58 first-line treatment for uncomplicated *Plasmodium falciparum* malaria for almost a decade (2).  
59 Artemisinin derivatives are very potent but rapidly eliminated from the body and should  
60 therefore not be administered as monotherapies but in combination with a slower acting partner  
61 drugs able to sustain sufficient parasitocidal concentrations to clear all remaining parasites (2).  
62 Amodiaquine (AQ) is often used as a seasonal malaria chemoprevention together with SP in  
63 children less than five years old who live in high seasonal malaria transmission countries (3).  
64 Artesunate-amodiaquine (AS-AQ) is one of the ACTs recommended by the WHO and was  
65 adopted as the first-line treatment in West Africa approximately ten years ago (4-7). Recently,  
66 AS-AQ was also recommended as the first-line treatment for mass drug administration (MDA) in  
67 Ebola-affected countries (8, 9).

68

69 Studies of the WHO's three-day AS-AQ regimen found it to be highly efficacious and safe in the  
70 treatment of uncomplicated falciparum malaria (10-16). However, while the clinical efficacy of  
71 AS-AQ is high, its real-life effectiveness varies substantially; studies in Africa have shown AS-  
72 AQ effectiveness to be between 63-85% (17-22). Many factors affect drug effectiveness in the  
73 field, including poor access to treatment, provider compliance to treatment guidelines, or  
74 adherence of patients and caregivers to prescriptions (23). AS-AQ can be prescribed as either  
75 fixed-dose combination (FDC) formulations or non-FDC (i.e. loose tablets or co-blistered  
76 tablets). FDCs include both AS and AQ in a single table, each containing either 25/67.5, 50/135  
77 or 100/270 mg AS/AQ depending on tablet strength (24). While non-FDC co-blister packs  
78 contain 50 mg of AS and 153 mg of AQ (25). Non-FDC formulations tend to be less user-  
79 friendly and allow patients to take only one of the two ACT components. FDC formulations  
80 reduce this problem and are recommended to increase adherence, thus delaying the development  
81 of resistance to both drugs (26-29).

82

83 It is recommended that the dose of AS-AQ is calculated according to a patient's body weight  
84 (30) but this can be logistically challenging in developing countries. Some health facilities for  
85 example may not have functional scales (10, 31). In practice, the amount of drug given to  
86 patients is commonly based on their age, which can lead to inaccurate dosing.

87

88 Clinical trials are mainly designed to test safety and efficacy of interventions, so the results of  
89 trials provide guidance for diagnosis, treatment and prevention. However, conducting clinical  
90 trials is expensive, time-consuming and restricted by ethical constraints, particularly when their

91 aim is to directly investigate the impact of poor patient adherence. Pharmacological models of  
92 drug treatment can overcome these problems and allow researchers to investigate drug  
93 effectiveness and drug regimen safety. Historically, pharmacological models of antimalarial drug  
94 treatment focused on monotherapies (32-37) but since the WHO recommendation of ACTs, the  
95 model methodologies have been extended to include combination therapies (38-44). This study  
96 used a pharmacological model for AS-AQ treatment to compare the efficacy, effectiveness and  
97 safety of different dosing regimens and FDC versus non-FDC in controlled and real-life settings.  
98 Moreover, this study evaluated the change of drug efficacy and effectiveness when patients  
99 adhere poorly to the recommended regimen.

100

## 101 **Methods**

102

### 103 [Pharmacological model](#)

104

105 This study adapted the pharmacological model described in Kay and Hastings (41) for the  
106 simulation of AS-AQ treatment outcome. The model, implemented in the statistical software R  
107 (version 3.1.0), tracks the number of parasites  $P$  over time  $t$  after treatment using the following  
108 differential equation (Equation 10 in (41))

109

$$\frac{dP}{dt} = P \left( a - f(I) - \sum_{d=1}^r f(C_d) \right) \quad (1)$$

110

111

112 where  $P$  is the number of parasites,  $a$  is the parasite growth rate,  $f(I)$  is the host's background  
113 immunity to the infection (which is assumed to kill parasites or slow their growth),  $r$  is the  
114 number of drugs and/or their active metabolites in the regimen and  $f(C_d)$  describes the drug  
115 effect (i.e. its kill rate) for each drug  $d$  depending on its concentration  $C_d$  (mg/L). Integrating  
116 Equation 1 gives the number of parasites  $P$  at time  $t$  (Equation 16 in (41))

117

$$P_t = P_0 e^{(a-f(I))t} \prod_{d=1}^r e^{-\int_0^t f(C_d) dt} \quad (2)$$

118

119

120 where  $P_t$  is the number of parasites at time  $t$ ,  $P_0$  is the number of parasites at the start of  
121 treatment. In this study, the hosts' background immunity was ignored and  $f(I)$  was set to zero so  
122 that all patients were malaria naive and had no acquired immunity.

123

124 The drug-dependent killing function for each drug  $d$  is described by the standard Michaelis-  
125 Menton equation, i.e.

126

$$f(C) = V_{max} \left( \frac{C^n}{C^n + IC_{50}^n} \right) \quad (3)$$

127

128 where  $V_{max}$  is the maximal drug-killing rate,  $n$  is the slope of the dose response curve, and  $IC_{50}$  is  
129 the concentration at which 50% of the maximal killing rate occurs.

130

131 For AS and its active metabolite dihydroartemisinin (DHA), the model tracked drug  
132 concentration over time using a standard one-compartment disposition model allowing for the  
133 absorption of the parent drug (i.e. AS) across the gut wall at rate  $k_a$  and conversion to its active  
134 metabolite DHA at rate  $k_m$  (**Figure 1**). Equations for tracking drug concentration over time are  
135 described in the original model by Kay and Hastings (41).

136  
137 For AQ and its active metabolite desethylamodiaquine (DEAQ), pharmacokinetics follow a more  
138 complex model. AQ and DEAQ were modelled as two separate drugs using a pair of two-  
139 compartment disposition models and a shared estimate of the absorption rate constant,  $k_a$  (**Figure**  
140 **2**); this approach was proposed and validated by Hietala et al (45). The model used the equation  
141 describing a drug with a three-compartment disposition (Equation 1.72 in (46)) but simplified to  
142 simulate two-compartments by setting the inter-compartmental clearance between compartments  
143 1 (the central, blood compartment) and 3 (the unused peripheral compartment) to zero. The  
144 model equations assume the drug has first-order absorption, linear elimination and allows for  
145 multiple doses without lag time so that the amount of drug  $C$  present in the central compartment  
146 at time  $t$  is

147

$$C(t) = \sum_{i=1}^n D_i (A e^{-\alpha(t-t_{Di})} + B e^{-\beta(t-t_{Di})}) + C e^{-\gamma(t-t_{Di})} - (A + B + C) e^{-k_a(t-t_{Di})} \quad (4)$$

148

149 where  $D$  is amount of drug (in mg) given in the  $i^{\text{th}}$  dose.  $A$ ,  $B$ ,  $C$  are macro-constants and  $\alpha$ ,  $\beta$   
150 and  $\gamma$  are rate constants (see (46) for more details).

151

152 Both drugs in the AS-AQ combination have two active forms, an active parent drug and an  
153 active metabolite. The model therefore determines four drug concentrations and four  
154 corresponding estimates of drug dependent killing  $f(C)$  at each time step. The drug killing of the  
155 parent drug and its metabolite were assumed to have similar modes of action and so their effect  
156 cannot be additive (as implied in Equation 1). So at the end of each time step, only the drug form  
157 with the higher parasite-killing rate contributed to drug effect. The AS/DHA and AQ/DEAQ  
158 forms with the higher parasite-killing rate were combined assuming additive drug action to  
159 update parasite numbers (for more details see methods of (41)).

160

161 To simulate dosing according to age or weight, region-specific weight-for-age references for a  
162 global population and African, Asian, and Latin American populations were included as  
163 described previously (47). In brief, each individual was randomly assigned an age between six  
164 months to 25 years and their weight was read from the regional references (48) for a randomly  
165 selected weight-for-age percentile.

166

## 167 Calibration and validation

168

169 Pharmacokinetic (PK) and pharmacodynamic (PD) parameters of AS and its metabolite DHA  
170 were previously validated in (41). The PK/PD parameters for AQ and DEAQ and their  
171 coefficient of variation (CV) estimates were extracted from the literature and are summarized in  
172 **Table 1**. For parameters where no CV was provided in the literature a default value of 30% was  
173 selected (as was done previously e.g. (40, 41)). It was assumed that parameters were normally  
174 distributed if the CV is  $\leq 50\%$  and log-normally distributed if they were  $> 50\%$ .



175  
176 The PK parameters were validated by comparing the simulated maximal plasma concentration  
177 ( $C_{max}$ ) and time to  $C_{max}$  ( $T_{max}$ ) of AQ and DEAQ to field observations (45). The PD parameters  
178 (40) were validated by matching simulated cure rates, parasite clearance times (PCT) and periods  
179 of chemoprophylaxis (PoC) to those estimated in clinical trials. The PCT is the time taken for the  
180 infection to fall below the limit of microscopic detection (defined here as  $<10^8$  parasites (49)).  
181 The PoC measures the time until new infections can occur after treatment, which is the duration  
182 of time that a drug suppresses the new infection. The PD parameters were taken from (50-53)  
183 and adjusted until the simulated cure rates, PCT and PoC matched field observations of the 28-  
184 day cure rate 96-98% (data from Nigerian children and Indian adults and children (13, 54) who  
185 were fully adherent and received age- or weight-based FDC regimens), the PCTs in these  
186 datasets were  $1 \pm 0.6$  days (54-56) and PoC were 22 – 25 days (57). These results were obtained  
187 assuming full adherence to an age-based FDC or non-FDC regimens from clinical trials usually  
188 enrolled children from Africa. The final PK and PD parameters are given in Table 1 and are well  
189 within the range observed in the clinic and laboratory (41, 45, 50-53, 58).

190

## 191 [Simulation and analysis](#)

192

193 This study compared the effectiveness and safety of different treatment regimens and drug  
194 formulations for the adherence scenarios listed in **Table 2**. Weight-based dosing regimens with  
195 fixed-dose and co-blistered combinations of AS-AQ were based on drug dose per patients'  
196 weight band as recommended by WHO ((2); **Table 3**). Note, individuals under 5 kg were  
197 excluded from this analysis and replaced by a new random sample record. Age-based dosing

198 regimens were selected from clinical trials (11, 59, 60) as WHO recommends only weight-based  
199 dosing regimens. The age- and weight-based regimens used in this study are presented in **Table**  
200 **3**.

201  
202 The details of the different model runs are outlined in **Table 4**. A single model ‘run’ simulates  
203 10,000 individuals for each of the regional weight-for-age distributions (representative of either a  
204 global, African, Asia or Latin American populations) and followed patients for 28 days after the  
205 start of treatment (i.e. the recommended follow-up duration according to the WHO guidelines  
206 (26)). Treatment outcome at 28 days was defined as follows; 1) all parasites cleared ( $P_t < 1$ ); 2)  
207 parasite are still present but below limit of microscopic detection (LoD) of  $P_t < 10^8$  and might  
208 subsequently either clear or recrudesce; 3) recrudesce which fell below LoD at some point  
209 during follow-up but later recrudesced to above LoD at some point before the end of the 28 day  
210 follow-up; 4) parasites are never cleared ( $P_t > 10^8$ ) and are always detectable during entire post-  
211 treatment period. Categories 1) and 2) were classified as clinical cures and categories 3) and 4)  
212 were classified as clinical failures (this corresponds to what is defined as cured/failures in the  
213 field).

214  
215 To reproduce results of drug effectiveness in a real life setting, the model accounted for missed  
216 doses and poor adherence, using patterns of non-adherence found in the literature (61, 62). An  
217 adherence level defined the proportion of patients that followed the recommended treatment  
218 regimens; seven adherence levels were investigated here i.e. 50%, 60%, 77%, 80%, 85%, 90%  
219 and 100%. So an adherence level of 77% for example, means 77% of patients followed the full

220 three day course of AS-AQ treatment and 23% followed one of the alternative scenarios listed in

221 **Table 2.**

222

223 Safety was assessed by determining the proportion of patients who received an AS and AQ dose

224 within the therapeutic range. The therapeutic range of AS was defined as 2–10 mg/kg/day and

225 7.5–15 mg/kg/day for AQ (2). The magnitude of under- and overdosing of AS and AQ was

226 determined as well as median values of  $C_{max}$  of AS, DHA, AQ, and DEAQ.

227

228 **Results**

229

230 [Efficacy and effectiveness of the WHO recommended regimen](#)

231

232 Efficacy describes how a drug performs under ideal conditions for example, when treatment is

233 directly observed in clinical trials. In contrast, effectiveness describes how well a drug works in a

234 real-life setting where, for instance, patients take medication unsupervised. The efficacy of the

235 WHO recommended target dose of 4 mg/kg AS and 10 mg/kg AQ daily (regimen A) with full-

236 adherence (scenario 1) was compared with the effectiveness of the same regimen in patients with

237 varying degrees of non-adherence (scenarios 2–6) at day 28 of follow-up (**Table 4** and **Figure**

238 **3**). Scenario 1 assumed all individuals took the full three days of treatment and resulted in a cure

239 rate of approximately 96%. When the third dose was missed (scenario 2) cure rates decreased to

240 80–94% depending on the proportion of non-adherent patients (**Figure 3A**). However, the WHO

241 regimen appears relatively robust with clinical cure rates remaining above 90% when half the

242 patient population only takes the first two treatment doses. In contrast, when 10% of patients

243 omitted both the second and third doses (scenario 3) cure rates dropped to 89% (**Figure 3B**). The  
244 proportion of patients cured drops to 23% when only the first dose of treatment is taken.  
245 Delaying the second dose by 12 hours (scenario 4) did not alter the drug effectiveness.  
246 Monotherapies of either AQ or AS given for three days (scenarios 5 and 6 respectively) showed  
247 low cure rates of 36% and 23% respectively (**Table 4**).

248  
249 In order to measure the immediate therapeutic response to the drugs, PCT was calculated. In  
250 scenarios 1 and 4, the median PCT was 1.25 days and the median time to recrudescence was 22  
251 days (data pooled over all the regimens) in both cases (**Figure 4**). The median PCT did not  
252 change until patients missed more than one dose of the combination. As expected, monotherapies  
253 with the fast acting, short-lived component AS, had a negligible impact on the median PCT but  
254 shortened the median time to recrudescence. Conversely, monotherapies with the slower acting,  
255 longer-lived AQ partner drug lengthened the median PCT but did not affect the time to  
256 recrudescence.

257

## 258 [Efficacy and effectiveness](#)

259

260 The cure rates of the six simulated age- and weight-based regimens (B to G, **Table 3**) were all  
261 above 96% when patients were fully adherent to the three day regimen (scenario 1, **Table 4**).  
262 Cure rates in the three regions were compared for each regimen and, were highest in Asia (97%)  
263 and lowest in Latin America (95%) assuming complete adherence to the regimen (**Figure 5A**).  
264 When all patients followed scenario 2 (i.e. omitted the third doses), the cure rates dropped below  
265 90% in all six regimens (**Figure 5B**) and when all patients followed scenario 3 (i.e. omitted the

266 second and third doses), the cure rates dropped to below 35% (**Figure 5C**). These results  
267 emphasize that full three day course of AS-AQ is necessary to treat uncomplicated falciparum  
268 malaria.

269

## 270 Drug dosing and safety evaluation

271

272 In scenario 1, all regimens showed high cure rates (i.e. >95 %) but selection of the ‘best’ or  
273 optimal regimen should also depend on the regimen’s safety profile. In absence of an absolute  
274 ‘toxic’ mg/kg dose or plasma concentration threshold, relatively ‘safe treatments’ were  
275 determined in the simulations using the proportion of patients who received doses in the  
276 recommended therapeutic range of AS and AQ. The therapeutic range was defined as 2–10  
277 mg/kg/day for AS and 7.5–15 mg/kg/day for AQ (26). **Table 5** and **Figure 6** show the proportion  
278 of patients under- or overdosed with either AS or AQ for each of the regimens described in  
279 **Table 3**. In the simulated populations 15% of patients received doses above and 4.4% below the  
280 therapeutic dose range of AQ. This was an average across all regimens and regions but there was  
281 considerable differences between regimens. For example, no patients following Regimen B (in  
282 all three continents) were overdosed. In addition, the two age-based dosing regimens seems more  
283 likely to over- or under-dose AQ. Asians are more likely to be overdosed and Latin Americans  
284 more likely to be under dose than any other regions (**Figure 6**).

285

286 The specific dose of AQ each patient received is given on **Figure 7** using examples of one age-  
287 and one or weight-based regimen (**Table 3**, regimens B and D respectively). The weight-based  
288 dosing regimen with FDC (regimen B) showed that overdosing of AQ was uncommon in all ages

289 (Figure 7A). The age-based dosing regimen showed that patients near the lower cutoff of each  
290 age band tended to receive higher mg/kg dosages and so were more frequently overdosed with  
291 AQ (Figure 7B). The proportion of patients overdosed decreased with increasing patient age  
292 with a small proportion of patients at the upper dosing band cut-offs being under-dosed (Figure  
293 7B).

294

## 295 Discussion

296

297 This study adapted an existing antimalarial pharmacological model to simulate AS-AQ treatment  
298 and compare the efficacy, effectiveness and safety of a variety of AS-AQ regimens based on  
299 fixed dose and non-fixed formulations and using either age- or weight-based dosing bands. The  
300 structural model used herein for AQ and its active metabolite was described previously (45), but  
301 the literature provides several alternative structural PK models (45, 63, 64). AQ and DEAQ were  
302 modelled as separate drugs with two-compartment PK model structures because it can be  
303 assumed that AQ and DEAQ have similar physiochemical characteristics such as their  
304 absorption, distribution, solubility and stability. Furthermore, the separate two-compartment PK  
305 models have an algebraic solution (41, 46) that makes it computationally preferable to a linked  
306 four-compartment PK model. Recently, more sophisticated PK models have become available  
307 using non-linear mixed-effect modeling (65) and our analysis could be extended to incorporate  
308 these more complex dynamics. In the meantime, we note that the simpler models provide a good  
309 fit to PK data and therefore constitute a good platform for our primary objectives of investigating  
310 the effects of age- and weight-based dosing bands and the impact of poor patient adherence.

311

312 The literature used to calibrate the PK model for AQ reported large inter-individual variation of  
313 PK parameters (45, 66), i.e. for absorption rate the CV was 100% and for volume of distribution  
314 the CV was 139%. Despite this, those CVs originating from a study that enrolled children were  
315 retained because they came from the study with the largest sample size. The CVs for the other  
316 PK parameters, i.e.  $k_a$ ,  $CL$ ,  $Vd_c$ , were too narrow and resulted in model output that was  
317 inconsistent with field data (45, 53). Consequently, CVs from a separate study that enrolled  
318 women with *P. vivax* malaria during and after pregnancy were used (58). Although, the volume  
319 of distribution in pregnant women was larger than in non-pregnant women, the variation of the  
320 PK parameters in that study was smaller than the one involving children. Where no CV for  
321 AQ/DEAQ specific PK and PD parameters could be found in the literature, the CV was set to 0.3  
322 (for further discussion see (41)). Note that the model ignored the acquired immunity of malaria  
323 as there is currently no consensus mathematical description of immune acquisition (see for  
324 example, (40, 67-69)) but it is important that the model can predict efficacy and effectiveness in  
325 the most vulnerable, i.e. non-immune, individuals. The cure rate for validation was thus selected  
326 from studies conducted in Asia or Africa (the latter with pediatric patients) because these  
327 populations are presumed to have relatively low immunity to falciparum malaria. Overall, the  
328 pharmacological model used here was able reproduce field data (13, 45, 54, 56, 70).

329  
330 The model generated cure rates, recrudescence rates and the safety profiles for six different  
331 regimens. The efficacies of all six regimens were high when patients adhered to the full three-  
332 day course of AS-AQ (scenario 1 and 4) and, as expected, lower when patients did not follow the  
333 three-day course (scenario 2 and 3). Monotherapies of either drug taken for three days (scenario  
334 5 and 6) also showed low cure rates as reported from clinical trials comparing monotherapy to

335 combination therapy (13, 55). This study also investigated safety of different dosing regimens  
336 and combinations. The weight-based dosing with FDC (regimen B) was the best option in regard  
337 to safety and was similar in terms of efficacy compared to the other regimens. Over- and under-  
338 dosing of AQ was a significant problem in the age-based dosing regimens.

339  
340 The pharmacological model generated similar proportions of cure rates with those observed in  
341 clinical trials for AS-AQ three day course treatments. Many clinical trials reported polymerase  
342 chain reaction (PCR)-corrected cure rates of 97% or above at day 28 or 42 after treatment when  
343 patients were treated with 10mg/kg of AQ for three days combined with artesunate (11, 13, 60,  
344 71). The model also generated 97% cure rate for full adherence. However, the model cure rates  
345 following AQ monotherapy (10mg/kg once daily for three days) were just 36% if cure rate is  
346 defined as patients who clear all parasites or 68% if cure rate is defined as patients who had  
347 parasites below the limit of microscopic detection. This is much lower than the day 28 PCR-  
348 corrected cure rates from equivalent clinical trials using AQ monotherapy, i.e. 88% in India (13),  
349 54% in Kenya (72), 79% in Senegal (72) and 85% in Gabon (72). In addition, when model  
350 follow-up to 28 days, the simulated cure rates dropped to 36% (defined as the proportion of  
351 patients with undetectable parasites). The  $IC_{50}$  values for AQ and DEAQ in this study might  
352 reflect resistant strains, thereby generating a lower cure rate than clinical trials. When  $IC_{50}$  was  
353 decreased from 0.02 mg/L to 0.01 mg/L, model cure rates become more similar to those reported  
354 in the studies i.e. 54% of patients cleared all parasites and 84 % of patients had undetectable  
355 parasites. These result suggests that *P. falciparum* is likely to be sensitive to AQ in Gabon but  
356 not in Kenya(72-74); possible reflecting the much higher usage of AQ in West- compared to  
357 East-Africa. As expected, these results indicate that monotherapy had risks of treatment failure



358 and emergence of drug resistance. Therefore, intensive effort is required to reduce monotherapy  
359 treatment by improving patients' adherence.

360

361 Adherence to ACT varies across regions, ranging from 48-94% (23, 75). To increase patient  
362 adherence, AS-AQ treatment is now available in co-blistered packaging or as FDC and the  
363 reported efficacies are more than 95% (29, 60). The Worldwide Antimalarial Resistance  
364 Network (WWARN) recently conducted a pooled analysis that included 43 studies with 9,106  
365 patients treated with a three day course of AS-AQ for uncomplicated falciparum malaria (7).  
366 Their study compared the efficacy of several AS-AQ combinations and found the efficacy of  
367 FDC (98.1%) and co-blistered non-FDC (97.9%) were similarly high but found the efficacy of  
368 loose non-FDC-30 (95%) was statistically significantly lower (7). The median AQ dosed  
369 received in the WWARN's pooled analysis was 32.4 mg/kg for FDC (AS/AQ ratio 2.7) and 35.3  
370 mg/kg for co-blister non-FDC (AS/AQ ratio 3.06) (7), which was very similar to that used in this  
371 model, i.e. a median AQ dose of 32.8 mg/kg for FDC and 35.9 mg/kg in co-blister non-FDC, and  
372 resulted in very similar AS/AQ ratios. It is gratifying to note the simulated cure rates for AS-AQ  
373 treatment with FDC and co-blistered non-FDC were highly consistent to the findings from the  
374 WWARN study. Patients in both the WWARN pooled analysis and the simulation receiving non-  
375 FDC formulations, tended to have slightly higher median dose of AQ. The proportion of patients  
376 receiving AQ doses below the therapeutic dose range was similarly consistent at 3.4% and 4.4%  
377 in the analysis by the WWARN AS-AQ study group and the simulation respectively. The only  
378 small deviation between the results of WWARN and the simulated patients occurred when  
379 measuring the proportion of patients under-dosed. WWARN report under-dosing with FDC in  
380 1.1% of patients and with co-blister non-FDC in 0.9% (7) of patients while the simulation

381 predicted under-dosing in 5.1% and 3.8% respectively. Since FDC contains less amount of AQ  
382 than co-blister combination, FDC had higher risk of under-dosing. However, the difference was  
383 small. Under-dosing has the potential to affect efficacy and effectiveness and the model  
384 predicted results highly consistent with those presented in WWARN's pooled analysis (7) except  
385 when simulating the proportion of patients receiving sub-therapeutic AQ doses.

386  
387 Patients overdosed with AQ are more prone to vomiting than those receiving the appropriate  
388 dose (76), a side effect that can make patients and caregivers reluctant to administer treatment  
389 (61). When treating children with AS-AQ, overdosing of the AQ component is a particular  
390 concern regardless of whether children are dosed according to their age or weight. A study in  
391 Senegal (10) gave patients co-blistered AS-AQ (AS 50 mg, AQ 153 mg) based on weight or age;  
392 2.1% of patients were overdosed with AQ when dosed according to weight and 17.8% were  
393 overdosed with AQ when dosed according to age. WWARN's pooled AS-AQ analysis (7)  
394 showed children received the lowest AQ total dose if they were under 12 months old (28.9  
395 mg/kg FDC vs 32.6 mg/kg co-blistered non-FDC) and the highest AQ per dose if they were 1–4  
396 years old (33.8 mg/kg FDC vs 38.3 mg/kg co-blistered non-FDC) (7). The simulated results  
397 presented here show similar patterns of under-dosing: Patients less than 12 months old received  
398 28.2 mg/kg with FDC and 32.0 mg/kg with non-FDC and children aged 1–4 years old received  
399 35.7 mg/kg with FDC and 40.5 mg/kg with non-FDC. Non-FDC formulations also tended to  
400 result in slightly higher amounts of AQ in all age groups and this trend was similar in the  
401 WWARN study (7). The authors of the WWARN study credited higher failure rates for the non-  
402 FDC products to the fact that the FDC product “was developed using a weight-for-age reference  
403 database from malaria endemic countries, to ensure optimal dosing with the pediatric

404 formulation”. When “applied either by weight- or age-based criteria” the FDC product “probably  
405 increases dosing accuracy, and the availability of different tablet strengths, including a pediatric  
406 formulation, obviates the need for tablet splitting, reduces the pill burden and potentially  
407 improves adherence”

408

409 The WHO recommends that first-line treatment should be changed when failure rates exceed  
410 10% (2). In this study, the clinical failure rate was less than 5% (assuming full adherence for all  
411 regimens) indicating that current treatment policies are adequate. Clinical failure rates increased  
412 dramatically to 15% when patients missed one dose of AS-AQ. As per WHO recommendations  
413 failure rate of 15% are expected to result in a change of treatment regimen. However, the  
414 importance of ensuring patient adherence with recommended drug doses and schedules was also  
415 simulated. Non-adherence was incorporated in the models and used to show that cure rates could  
416 be improved to above 90% if less than half the simulated population missed one dose of AS-AQ  
417 combination treatment or if no more than 10% of the population missed two doses of AS-AQ.  
418 Clearly careful monitoring of patient adherence is needed for successful control of malaria but is  
419 difficult to quantify in practice (23). Non-adherence often leads to more patients with sub-  
420 therapeutic drug levels. This causes two main problems, first more patients fail treatment and  
421 often require re-treating which in turn results in higher treatment costs and second, sub-  
422 therapeutic drug levels may increase the appearance and subsequent spread of drug resistance.

423

424 The WHO guidelines (2) recommend that treatment doses be calculated according to the  
425 patients’ body weight (30). In most of the malaria endemic countries, dosing by age is a more  
426 common practice, in some cases due to the lack of functional scales (77) but more often because

427 health workers prefer to prescribe according to age for simplicity (31). This study showed that  
428 simulated patients who received age-based doses had highest AQ levels in the younger ages  
429 within each age band (not surprising given that younger patients tend to be lighter). A clinical  
430 trial in Senegal showed that dosing patients according to body weight resulted in more correct  
431 AQ doses; 18% of patients were overdosed with AQ when treated according to age and 13%  
432 were overdosed with AQ when treated according to body weight (10). These results show the  
433 benefits to patients that result from the use of regional weight-for-age distributions to optimize  
434 age-based dosing regimens (78).

435

436 When comparing the results across different populations globally, these simulated results show  
437 Asian populations are at the highest risk of receiving AQ above the therapeutic range and Latin  
438 American populations had the highest risk of receiving AQ below the therapeutic range. This  
439 become particularly apparent when simulated patients were dosed according to their age. One  
440 possible explanation is that Asian people tend to weigh less than Latin Americans (48). This  
441 reinforces the importance of using regional weight-for-age distributions to inform treatment  
442 decisions at a regional or country level.

443

#### 444 **Conclusion**

445

446 In conclusion, the simulated probability of receiving an AQ over-dose and predicted drug  
447 effectiveness were highly consistent with clinical trials. Efficacy and effectiveness were high in  
448 all regimens when simulating fully adherent patients, but FDCs have a major advantage in ensure  
449 patients take both drugs in the ACT so minimizing the risks associated with patients taking AS or

450 AQ monotherapies. The FDC weight-based dosing regimens had better proportion of patients  
451 receiving the recommended target dose and will remain the preferred regimen. However, it must  
452 be recognized that this is not always feasible, whether it is due to technical difficulties locally,  
453 healthcare preference or simply a logistical problem, for example in large MDA campaigns.  
454 Age-based dosing regimens should therefore be designed with consideration of the region-  
455 specific the probability of AQ over-dosing to reduce the risk of overdosing in the most at-risk  
456 populations.

457

458

459

460 **Abbreviations**

|     |       |                                           |
|-----|-------|-------------------------------------------|
| 461 | ACT   | artemisinin-based combination therapy     |
| 462 | AQ    | amodiaquine                               |
| 463 | AS-AQ | artesunate-amodiaquine                    |
| 464 | CQ    | chloroquine                               |
| 465 | CV    | coefficient of variation                  |
| 466 | DEAQ  | desethylamodiaquine                       |
| 467 | DHA   | dihydroartemisinin                        |
| 468 | FDC   | fixed-dose combination                    |
| 469 | LoD   | limit of microscopic detection            |
| 470 | MDA   | mass drug administration                  |
| 471 | MQ    | mefloquine                                |
| 472 | PCR   | polymerase chain reaction                 |
| 473 | PCT   | parasite clearance times                  |
| 474 | PD    | pharmacodynamic                           |
| 475 | PK    | pharmacokinetic                           |
| 476 | PoC   | periods of chemoprophylaxis               |
| 477 | SP    | sulphadoxine-pyrimethamine                |
| 478 | WHO   | World Health Organization                 |
| 479 | WWARN | Worldwide Antimalarial Resistance Network |

480

481 **Ethics approval and consent to participate**

482 Not applicable

483

484 **Consent for publication**

485 Not applicable

486

487 **Competing interests**

488 The authors declare that they have no competing interests

489

490

491 **Funding**

492 This work was funded by the Bill and Melinda Gates Foundation (grant 37999.01) and the

493 Medical Research Council (grant G110052) and supported by the Liverpool School of Tropical

494 Medicine.

495

496 **Authors' Contributions**

497 EMH & KK conceived the study. KBH calibrated and validated the model, and generated the

498 results. All authors interpreted the results. KBH wrote the first draft of the manuscript. All

499 authors gave critical input and contributed to the writing of the manuscript. All authors have read

500 and approved the final manuscript.

501

502 **Reference**

- 503 1. WHO. World Malaria Report 2014. Geneva: World Health Organization; 2014.
- 504 2. WHO. Guidelines for the treatment of malaria. Geneva: World Health Organization;  
505 2015.
- 506 3. WHO. WHO Policy Recommendation: Seasonal Malaria Chemoprevention (SMC) for  
507 *Plasmodium falciparum* malaria control in highly seasonal transmission areas of the Sahel sub-  
508 region in Africa. 2012 March 2012.
- 509 4. Kremsner PG, Krishna S. 2004. Antimalarial combinations. Lancet. doi:10.1016/s0140-  
510 6736(04)16680-4
- 511 5. Kerb R, Fux R, Morike K, Kremsner PG, Gil JP, Gleiter CH, et al. 2009.  
512 Pharmacogenetics of antimalarial drugs: effect on metabolism and transport. Lancet Infect Dis.  
513 doi:10.1016/s1473-3099(09)70320-2
- 514 6. Oguche S, Okafor HU, Watila I, Meremikwu M, Agomo P, Ogala W, et al. 2014.  
515 Efficacy of artemisinin-based combination treatments of uncomplicated falciparum malaria in  
516 under-five-year-old Nigerian children. The American journal of tropical medicine and hygiene.  
517 doi:10.4269/ajtmh.13-0248
- 518 7. Group TWWARNA-AS. 2015. The effect of dosing strategies on the therapeutic efficacy  
519 of artesunate-amodiaquine for uncomplicated malaria: a meta-analysis of individual patient data.  
520 BMC Med. doi:10.1186/s12916-015-0301-z
- 521 8. WHO. Guidance on temporary malaria control measures in Ebola-affected countries.  
522 Geneva, Switzerland: World Health Organization; 2014.
- 523 9. WHO. Malaria: Preventive therapies: World Health Organization; 2015 [Available from:  
524 [http://www.who.int/malaria/areas/preventive\\_therapies/en/](http://www.who.int/malaria/areas/preventive_therapies/en/).



- 525 10. Brasseur P, Agnamey P, Gaye O, Cisse M, Badiane M, Vaillant M, et al. 2009. Dosing  
526 accuracy of artesunate and amodiaquine as treatment for falciparum malaria in Casamance,  
527 Senegal. *Tropical medicine & international health : TM & IH*. doi:10.1111/j.1365-  
528 3156.2008.02190.x
- 529 11. Espie E, Lima A, Atua B, Dhorda M, Flevaud L, Sompwe EM, et al. 2012. Efficacy of  
530 fixed-dose combination artesunate-amodiaquine versus artemether-lumefantrine for  
531 uncomplicated childhood Plasmodium falciparum malaria in Democratic Republic of Congo: a  
532 randomized non-inferiority trial. *Malaria journal*. doi:10.1186/1475-2875-11-174
- 533 12. Faye B, Offianan AT, Ndiaye JL, Tine RC, Toure W, Djoman K, et al. 2010. Efficacy  
534 and tolerability of artesunate-amodiaquine (Camoquin plus) versus artemether-lumefantrine  
535 (Coartem) against uncomplicated Plasmodium falciparum malaria: multisite trial in Senegal and  
536 Ivory Coast. *Tropical medicine & international health : TM & IH*. doi:10.1111/j.1365-  
537 3156.2010.02487.x
- 538 13. Anvikar AR, Sharma B, Shahi BH, Tyagi PK, Bose TK, Sharma SK, et al. 2012.  
539 Artesunate-amodiaquine fixed dose combination for the treatment of Plasmodium falciparum  
540 malaria in India. *Malaria journal*. doi:10.1186/1475-2875-11-97
- 541 14. van den Broek I, Kitz C, Al Attas S, Libama F, Balasegaram M, Guthmann JP. 2006.  
542 Efficacy of three artemisinin combination therapies for the treatment of uncomplicated  
543 Plasmodium falciparum malaria in the Republic of Congo. *Malaria journal*. doi:10.1186/1475-  
544 2875-5-113
- 545 15. Thanh NX, Trung TN, Phong NC, Quang HH, Dai B, Shanks GD, et al. 2012. The  
546 efficacy and tolerability of artemisinin-piperaquine (Artequick(R)) versus artesunate-

- 547 amodiaquine (Coarsucam) for the treatment of uncomplicated Plasmodium falciparum malaria in  
548 south-central Vietnam. *Malaria journal*. doi:10.1186/1475-2875-11-217
- 549 16. Ndounga M, Mayengue PI, Casimiro PN, Loumouamou D, Basco LK, Ntoumi F, et al.  
550 2013. Artesunate-amodiaquine efficacy in Congolese children with acute uncomplicated  
551 falciparum malaria in Brazzaville. *Malaria journal*. doi:10.1186/1475-2875-12-53
- 552 17. Oyakhirome S, Potschke M, Schwarz NG, Dornemann J, Laengin M, Salazar CO, et al.  
553 2007. Artesunate--amodiaquine combination therapy for falciparum malaria in young Gabonese  
554 children. *Malaria journal*. doi:10.1186/1475-2875-6-29
- 555 18. Pereira EA, Ishikawa EA, Fontes CJ. 2011. Adherence to Plasmodium vivax malaria  
556 treatment in the Brazilian Amazon Region. *Malaria journal*. doi:10.1186/1475-2875-10-355
- 557 19. Cohen JL, Yavuz E, Morris A, Arkedis J, Sabot O. 2012. Do patients adhere to over-the-  
558 counter artemisinin combination therapy for malaria? evidence from an intervention study in  
559 Uganda. *Malaria journal*. doi:10.1186/1475-2875-11-83
- 560 20. Mace KE, Mwandama D, Jafari J, Luka M, Filler SJ, Sande J, et al. 2011. Adherence to  
561 treatment with artemether-lumefantrine for uncomplicated malaria in rural Malawi. *Clinical  
562 infectious diseases : an official publication of the Infectious Diseases Society of America*.  
563 doi:10.1093/cid/cir498
- 564 21. Souares A, Lalou R, Sene I, Sow D, Le Hesran JY. 2009. Factors related to compliance to  
565 anti-malarial drug combination: example of amodiaquine/sulphadoxine-pyrimethamine among  
566 children in rural Senegal. *Malaria journal*. doi:10.1186/1475-2875-8-118
- 567 22. WHO. Summary of treatment failure rates among patients infected with P. falciparum,  
568 grouped by treatment and country. World Health Organization; 2015.

- 569 23. Banek K, Lalani M, Staedke SG, Chandramohan D. 2014. Adherence to artemisinin-  
570 based combination therapy for the treatment of malaria: a systematic review of the evidence.  
571 *Malaria journal*. doi:10.1186/1475-2875-13-7
- 572 24. winthrop MA. Name of The Medical Product. 2010.
- 573 25. USAID. Guidelines for Managing the Malaria Supply Chain. U.S. ; 2011.
- 574 26. WHO. Guidelines for the treatment of malaria. Geneva, Switzerland: World Health  
575 Organization; 2010.
- 576 27. Ratsimbasoa A, Ravony H, Vonimpaisomihanta JA, Raherinjafy R, Jahevitra M,  
577 Rapelanoro R, et al. 2012. Compliance, safety, and effectiveness of fixed-dose artesunate-  
578 amodiaquine for presumptive treatment of non-severe malaria in the context of home  
579 management of malaria in Madagascar. *The American journal of tropical medicine and hygiene*.  
580 doi:10.4269/ajtmh.2012.11-0047
- 581 28. Faucher JF, Aubouy A, Adeothy A, Cottrell G, Doritchamou J, Gourmel B, et al. 2009.  
582 Comparison of sulfadoxine-pyrimethamine, unsupervised artemether-lumefantrine, and  
583 unsupervised artesunate-amodiaquine fixed-dose formulation for uncomplicated plasmodium  
584 falciparum malaria in Benin: a randomized effectiveness noninferiority trial. *J Infect Dis*.  
585 doi:10.1086/599378
- 586 29. Ndiaye JL, Randrianarivelosia M, Sagara I, Brasseur P, Ndiaye I, Faye B, et al. 2009.  
587 Randomized, multicentre assessment of the efficacy and safety of ASAQ--a fixed-dose  
588 artesunate-amodiaquine combination therapy in the treatment of uncomplicated Plasmodium  
589 falciparum malaria. *Malaria journal*. doi:10.1186/1475-2875-8-125

- 590 30. WHO. Antimalarial drug combination therapy: report of a WHO Technical Consultation.  
591 Geneva: World Health Organization; 2001. Contract No.: Document no.  
592 WHO/CDS/RBM/2001.35.
- 593 31. Souares A, Lalou R, Senghor P, Le Hesran JY. 2010. Child age or weight: difficulties  
594 related to the prescription of the right dosage of antimalarial combinations to treat children in  
595 Senegal. Transactions of the Royal Society of Tropical Medicine and Hygiene.  
596 doi:10.1016/j.trstmh.2009.07.018
- 597 32. Austin DJ, White NJ, Anderson R. 1998. The dynamics of drug action on the within-host  
598 population growth of infectious agents: melding pharmacokinetics with pathogen population  
599 dynamics. J Theor Biol.
- 600 33. Hoshen MB, Na-Bangchang K, Stein WD, Ginsburg H. 2000. Mathematical modelling of  
601 the chemotherapy of *Plasmodium falciparum* malaria with artesunate: postulation of ‘dormancy’,  
602 a partial cytostatic effect of the drug, and its implication for treatment regimens. Parasitology.
- 603 34. Hoshen MB, Stein WD, Ginsburg H. 1998. Modelling the chloroquine chemotherapy of  
604 falciparum malaria: the value of spacing a split dose. Parasitology.
- 605 35. Hoshen MB, Stein WD, Ginsburg HD. 2001. Pharmacokinetic-pharmacodynamic  
606 modelling of the antimalarial activity of mefloquine. Parasitology.
- 607 36. Saralamba S, Pan-Ngum W, Maude RJ, Leea SJ, Tarning J, Lindegårdh N, et al. 2011.  
608 Intrahost modeling of artemisinin resistance in *Plasmodium falciparum*. PNAS.
- 609 37. Simpson JA, Jansen KM, Price RN, White NJ, Lindegårdh N, Tarning J, et al. 2009.  
610 Towards optimal design of anti-malarial pharmacokinetic studies. Malaria journal.  
611 doi:10.1186/1475-2875-8-189

- 612 38. Hoshen MB, Stein WD, Ginsburg H. 2002. Mathematical modelling of malaria  
613 chemotherapy: combining artesunate and mefloquine. *Parasitology*.
- 614 39. Zaloumis S, Humberstone A, Charman SA, Price RN, Moehrle J, Gamo-Benito J, et al.  
615 2012. Assessing the utility of an anti-malarial pharmacokinetic-pharmacodynamic model for  
616 aiding drug clinical development. *Malar J*.
- 617 40. Winter K, Hastings IM. 2011. Development, evaluation, and application of an in silico  
618 model for antimalarial drug treatment and failure. *Antimicrobial agents and chemotherapy*.  
619 doi:10.1128/aac.01712-10
- 620 41. Kay K, Hastings IM. 2013. Improving pharmacokinetic-pharmacodynamic modeling to  
621 investigate anti-infective chemotherapy with application to the current generation of antimalarial  
622 drugs. *PLoS Comput Biol*. doi:10.1371/journal.pcbi.1003151
- 623 42. Kay K, Hodel EM, Hastings IM. 2014. Improving the role and contribution of  
624 pharmacokinetic analyses in antimalarial drug clinical trials. *Antimicrobial Agents and  
625 Chemotherapy*. doi:10.1128/aac.02777-14
- 626 43. Hodel EM, Kay K, Hayes D, Terlouw D, Hastings I. 2014. Optimizing the programmatic  
627 deployment of the anti-malarials artemether-lumefantrine and dihydroartemisinin-piperaquine  
628 using pharmacological modelling. *Malaria journal*.
- 629 44. Kay K, Hodel EM, Hastings IM. 2015. Altering drug regimens to restore and enhance  
630 antimalarial drug effectiveness. *Antimicrob Agents Chemother*.
- 631 45. Hietala SF, Bhattarai A, Msellem M, Roshammar D, Ali AS, Stromberg J, et al. 2007.  
632 Population pharmacokinetics of amodiaquine and desethylamodiaquine in pediatric patients with  
633 uncomplicated falciparum malaria. *Journal of pharmacokinetics and pharmacodynamics*.  
634 doi:10.1007/s10928-007-9064-2

- 635 46. Bertrand J, Mentré F. Mathematical expressions of the pharmacokinetic and  
636 pharmacodynamic models implemented in the Monolix software. Paris Diderot University: Paris  
637 Diderot University; 2008.
- 638 47. Hodel EM, Kay K, Hayes DJ, Terlouw DJ, Hastings IM. 2014. Optimizing the  
639 programmatic deployment of the anti-malarials artemether-lumefantrine and dihydroartemisinin-  
640 piperazine using pharmacological modelling. *Malaria journal*. doi:10.1186/1475-2875-13-138
- 641 48. Hayes DJ, van Buuren S, ter Kuile FO, Stasinopoulos DM, Rigby RA, Terlouw DJ. 2015.  
642 Developing regional weight-for-age growth references for malaria-endemic countries to optimize  
643 age-based dosing of antimalarials. *Bull World Health Organ*. doi:10.2471/blt.14.139113
- 644 49. White NJ. 2002. The assessment of antimalarial drug efficacy. *Trends in parasitology*.
- 645 50. Pradines B, Tall A, Parzy D, Spiegel A, Fusai T, Hienne R, et al. 1998. In-vitro activity  
646 of pyronaridine and amodiaquine against African isolates (Senegal) of *Plasmodium falciparum* in  
647 comparison with standard antimalarial agents. *J Antimicrob Chemother*.
- 648 51. Nawaz F, Nsobya SL, Kiggundu M, Joloba M, Rosenthal PJ. 2009. Selection of parasites  
649 with diminished drug susceptibility by amodiaquine-containing antimalarial regimens in Uganda.  
650 *J Infect Dis*. doi:10.1086/647988
- 651 52. White NJ. 1997. Assessment of the pharmacodynamic properties of antimalarial drugs in  
652 vivo. *Antimicrobial agents and chemotherapy*.
- 653 53. Stepniewska K, White NJ. 2008. Pharmacokinetic determinants of the window of  
654 selection for antimalarial drug resistance. *Antimicrobial agents and chemotherapy*.  
655 doi:10.1128/aac.00903-07
- 656 54. Michael OS, Gbotosho GO, Folarin OA, Okuboyejo T, Sowunmi A, Oduola AM, et al.  
657 2010. Early variations in *plasmodium falciparum* dynamics in Nigerian children after treatment

- 658 with two artemisinin-based combinations: implications on delayed parasite clearance. *Malaria*  
659 *journal*. doi:10.1186/1475-2875-9-335
- 660 55. Sowunmi A, Balogun T, Gbotosho GO, Happi CT, Adedeji AA, Fehintola FA. 2007.  
661 Activities of amodiaquine, artesunate, and artesunate-amodiaquine against asexual- and sexual-  
662 stage parasites in falciparum malaria in children. *Antimicrobial agents and chemotherapy*.  
663 doi:10.1128/aac.00077-07
- 664 56. Fehintola FA, Adedeji AA, Gbotosho GO, Happi CT, Balogun ST, Folarin OA, et al.  
665 2008. Effects of artesunate-cotrimoxazole and amodiaquine-artesunate against asexual and  
666 sexual stages of *Plasmodium falciparum* malaria in Nigerian children. *J Infect Chemother*.  
667 doi:10.1007/s10156-008-0603-6
- 668 57. O'Neill PM, Shone AE, Stanford D, Nixon G, Asadollahy E, Park BK, et al. 2009.  
669 Synthesis, antimalarial activity, and preclinical pharmacology of a novel series of 4'-fluoro and  
670 4'-chloro analogues of amodiaquine. Identification of a suitable "back-up" compound for N-tert-  
671 butyl isoquine. *Journal of medicinal chemistry*. doi:10.1021/jm8012757
- 672 58. Tarning J, Chotsiri P, Jullien V, Rijken MJ, Bergstrand M, Cammas M, et al. 2012.  
673 Population pharmacokinetic and pharmacodynamic modeling of amodiaquine and  
674 desethylamodiaquine in women with *Plasmodium vivax* malaria during and after pregnancy.  
675 *Antimicrobial agents and chemotherapy*. doi:10.1128/aac.01242-12
- 676 59. Brasseur P, Agnamey P, Gaye O, Vaillant M, Taylor WR, Olliaro PL. 2007. Efficacy and  
677 safety of artesunate plus amodiaquine in routine use for the treatment of uncomplicated malaria  
678 in Casamance, southern Senegal. *Malaria journal*. doi:10.1186/1475-2875-6-150
- 679 60. Gbotosho GO, Sowunmi A, Okuboyejo TM, Happi CT, Folarin OA, Michael OS, et al.  
680 2011. Therapeutic efficacy and effects of artemether-lumefantrine and artesunate-amodiaquine

- 681 coformulated or copackaged on malaria-associated anemia in children with uncomplicated  
682 *Plasmodium falciparum* malaria in Southwest Nigeria. *The American journal of tropical*  
683 *medicine and hygiene*. doi:10.4269/ajtmh.2011.10-0582
- 684 61. Gerstl S, Dunkley S, Mukhtar A, Baker S, Maikere J. 2010. Successful introduction of  
685 artesunate combination therapy is not enough to fight malaria: results from an adherence study in  
686 Sierra Leone. *Transactions of the Royal Society of Tropical Medicine and Hygiene*.  
687 doi:10.1016/j.trstmh.2009.12.008
- 688 62. Beer N, Ali AS, Rotllant G, Abass AK, Omari RS, Al-mafazy AW, et al. 2009.  
689 Adherence to artesunate-amodiaquine combination therapy for uncomplicated malaria in  
690 children in Zanzibar, Tanzania. *Tropical medicine & international health : TM & IH*.  
691 doi:10.1111/j.1365-3156.2009.02289.x
- 692 63. Adjei GO, Kristensen K, Goka BQ, Hoegberg LC, Alifrangis M, Rodrigues OP, et al.  
693 2008. Effect of concomitant artesunate administration and cytochrome P450C8 polymorphisms  
694 on the pharmacokinetics of amodiaquine in Ghanaian children with uncomplicated malaria.  
695 *Antimicrobial agents and chemotherapy*. doi:10.1128/aac.00673-07
- 696 64. Stepniewska K, Taylor W, Sirima SB, Ouedraogo EB, Ouedraogo A, Gansane A, et al.  
697 2009. Population pharmacokinetics of artesunate and amodiaquine in African children. *Malaria*  
698 *journal*. doi:10.1186/1475-2875-8-200
- 699 65. Ali AM, Penny MA, Smith TA, Workman L, Sasi P, Adjei GO, et al. 2018. Population  
700 Pharmacokinetics of the Antimalarial Amodiaquine: a Pooled Analysis To Optimize Dosing.  
701 *Antimicrobial agents and chemotherapy*. doi:10.1128/aac.02193-17
- 702 66. Ajayi IO, Browne EN, Bateganya F, Yar D, Happi C, Falade CO, et al. 2008.  
703 Effectiveness of artemisinin-based combination therapy used in the context of home



- 704 management of malaria: a report from three study sites in sub-Saharan Africa. *Malaria journal*.  
705 doi:10.1186/1475-2875-7-190
- 706 67. Pongtavornpinyo W, Yeung S, Hastings I, Dondorp A, Day N, White N. 2008. Spread of  
707 anti-malarial drug resistance: Mathematical model with implications for ACT drug policies.  
708 *Malaria Journal*.
- 709 68. Maire N, Smith T, Ross A, Owusu-Agyei S, Dietz K, Molineaux L. 2006. A model for  
710 natural immunity to asexual blood stages of *Plasmodium falciparum* malaria in endemic areas.  
711 *The American journal of tropical medicine and hygiene*.
- 712 69. Molineaux L, Diebner HH, Eichner M, Collins WE, Jeffery GM, Dietz K. 2001.  
713 *Plasmodium falciparum* parasitaemia described by a new mathematical model. *Parasitology*.  
714 doi:doi:10.1017/S0031182001007533
- 715 70. Sirima SB, Gansane A. 2007. Artesunate-amodiaquine for the treatment of  
716 uncomplicated malaria. *Expert Opin Investig Drugs*. doi:10.1517/13543784.16.7.1079
- 717 71. Schramm B, Valeh P, Baudin E, Mazinda CS, Smith R, Pinoges L, et al. 2013.  
718 Tolerability and safety of artesunate-amodiaquine and artemether-lumefantrine fixed dose  
719 combinations for the treatment of uncomplicated *Plasmodium falciparum* malaria: two open-  
720 label, randomized trials in Nimba County, Liberia. *Malaria journal*. doi:10.1186/1475-2875-12-  
721 250
- 722 72. Adjuik M, Agnamey P, Babiker A, Borrmann S, Brasseur P, Cisse M, et al. 2002.  
723 Amodiaquine-artesunate versus amodiaquine for uncomplicated *Plasmodium falciparum* malaria  
724 in African children: a randomised, multicentre trial. *Lancet*.
- 725 73. Holmgren G, Hamrin J, Svard J, Martensson A, Gil JP, Bjorkman A. 2007. Selection of  
726 *pfmdr1* mutations after amodiaquine monotherapy and amodiaquine plus artemisinin

727 combination therapy in East Africa. *Infection, genetics and evolution : journal of molecular*  
728 *epidemiology and evolutionary genetics in infectious diseases.*  
729 doi:10.1016/j.meegid.2007.03.005

730 74. Mutabingwa TK, Anthony D, Heller A, Hallett R, Ahmed J, Drakeley C, et al. 2005.  
731 Amodiaquine alone, amodiaquine+sulfadoxine-pyrimethamine, amodiaquine+artesunate, and  
732 artemether-lumefantrine for outpatient treatment of malaria in Tanzanian children: a four-arm  
733 randomised effectiveness trial. *Lancet.* doi:10.1016/s0140-6736(05)66417-3

734 75. Bruxvoort K, Goodman C, Kachur SP, Schellenberg D. 2014. How patients take malaria  
735 treatment: a systematic review of the literature on adherence to antimalarial drugs. *PLoS One.*  
736 doi:10.1371/journal.pone.0084555

737 76. Cairns M, Cisse B, Sokhna C, Cames C, Simondon K, Ba EH, et al. 2010. Amodiaquine  
738 dosage and tolerability for intermittent preventive treatment to prevent malaria in children.  
739 *Antimicrobial agents and chemotherapy.* doi:10.1128/aac.01161-09

740 77. Barnes KI, Watkins WM, White NJ. 2008. Antimalarial dosing regimens and drug  
741 resistance. *Trends in parasitology.* doi:10.1016/j.pt.2007.11.008

742 78. Taylor W, Terlouw DJ, Olliaro PL, White NJ, Brasseur P, ter Kuile FO. 2006. Use of  
743 weight-for-age-data to optimize tablet strength and dosing regimens for a new fixed-dose  
744 artesunate-amodiaquine combination for treating falciparum malaria. *Bulletin of the World*  
745 *Health Organization.*

746

747

748 **Figure legends**

749

750 **Figure 1. Structural pharmacokinetic model of artesunate (AS).** AS follows a one-  
751 compartment disposition model, where it is absorbed from the gut at rate  $k_a$  and converted into  
752 dihydroartemisinin (DHA) at rate  $k_m$ . DHA is eliminated at rate  $k_{DHA}$ . Note that full conversion of  
753 AS to DHA was assumed i.e. AS was not eliminated, only converted

754 Abbreviations: AS: artesunate; DHA: dihydroartemisinin;  $V_{AS}$ : volume of distribution of AS;  
755  $V_{DHA}$ ; volume of distribution of DHA. This figure was adapted from Kay and Hasting (41).

756

757 **Figure 2. Structural pharmacokinetic model of amodiaquine (AQ) and**  
758 **desethylamodiaquine (DEAQ).** The model includes two separate two-compartment models of  
759 AQ (Panel A) and its active metabolite DEAQ (Panel B). Both models share the same absorption  
760 rate ( $k_a$ ) but the remaining parameters were estimated independently for AQ and DEAQ. This  
761 figure was adapted from Hietala *et al.* (45).

762 Abbreviations:  $k_a$ : absorption rate constant;  $V_{d_c}$ : central volume of distribution;  $V_{d_p}$ : peripheral  
763 volume of distribution; AQ: amodiaquine; DEAQ: desethylamodiaquine;  $k_{AQ/DEAQ}$ : elimination  
764 rate constants for AQ and DEAQ respectively;  $Q$ : distribution clearance between compartment.

765

766 **Figure 3. The impact of patient adherence on treatment outcome.** This was in patients  
767 prescribed regimen A (7), i.e. prescribed the therapeutic target dose of 4 mg/kg/day for  
768 artesunate and 10 mg/kg/day for amodiaquine (26) (**Table 3**). Each bar in the plots represents a  
769 decreasing proportion of fully-adherent patients in the simulated population. Non-adherent

770 patients were assumed to take their regimen according to **(A)** Scenario 2, i.e. missed their third  
771 treatment dose (**Table 2**), or **(B)** Scenario 3, i.e. missed both their second and third doses (**Table**  
772 **2**).

773 Abbreviation: LoD: limit of microscopic detection; Recrude: Recrudescence

774

775

776 **Figure 4. Distribution of parasite clearance time (PCT) and time to recrudescence (TTR)**  
777 **(28).** PCT and TTR following treatment with artesunate-amodiaquine (7) and different scenarios  
778 (detailed in **Table 2**).

779

780 **Figure 5. Treatment outcome in patients receiving age- or weight-based dosing regimens of**  
781 **artesunate-amodiaquine.** Scenario 1 treatment outcome for regimens B to G (**Table 3**)  
782 simulated using three different region-specific weight-for-age references (Africa, Asia and Latin  
783 America). The panels represent the patients **(A)** were fully adherent (Scenario 1); **(B)** omitted  
784 one dose of AS-AQ (Scenario 2); **(C)** omitted two doses of AS-AQ (Scenario 3)

785

786 **Figure 6. The percentage of patients over- or under-dosed with amodiaquine (AQ)**  
787 **depending on regional weight-for-age distribution.** Patients were dosed according to either  
788 weight (red) or age (green) and given either a fixed dose formulation (yellow) or a co-blistered  
789 formulation (purple) of artesunate-amodiaquine. Regimens B to G were as described in **Table 3**.

790

791 **Figure 7. Amodiaquine (AQ) dosage received by simulated patients dosed according to**  
792 **weight or age.** Simulated regimens are listed in **Table 3.** **(A)** Weight-based regimens (regimens  
793 **B).** **(B)** Age-based regimens (regimens **D**). The red dotted lines indicate the therapeutic dose  
794 range of AQ (26). The blue arrows indicate the cut-off points of the age-based regimen.

795

**Table 1. Antimalarial drug parameters for artesunate, amodiaquine and their active metabolites (DHA and DEAQ).** The reported values are mean parameters (coefficient of variation).

| <b>Drug parameter</b> | <b>AS (41)</b> | <b>DHA (41)</b> | <b>AQ (45, 58)</b> | <b>DEAQ (45, 58)</b> |
|-----------------------|----------------|-----------------|--------------------|----------------------|
| $Vd_c$ (L/kg)         | 46.6 (82)      | 15 (48)         | 8 (65)             | 18.4 (48)            |
| $Vd_p$ (L/kg)         | –              | –               | 280 (26)           | 68 (18)              |
| $CL$ (L/hr)           | –              | –               | 14 (22)            | 0.66 (123)           |
| $k_a$ (/day)          | 23.98 (68)     | –               | 2.16 (30)          | 2.16 (30)            |
| $k_m$ (/day)          | 11.97 (65)     | –               | –                  | –                    |
| $k$ (/day)            | –              | 44.15 (123)     | –                  | –                    |
| $Q$ (L/hr)            | –              | –               | 17 (26)            | 1.3 (30)             |
| $IC_{50}$ (mg/L)      | 0.0023 (79)    | 0.009 (117)     | 0.0043 (163) (50)  | 0.02 (132) (51)      |
| $V_{max}^a$ (/day)    | 27.6           | 27.6            | 2.3 (52)           | 2.3 (52)             |
| $n$                   | 4              | 4               | 7 (53)             | 7 (53)               |

Abbreviations:  $Vd_c$ : central volume of distribution;  $Vd_p$ : peripheral volume of distribution;  $CL$ : clearance;  $k_a$ : absorption rate of parent drug;  $k_m$ : conversion rate to active metabolite;  $k$ : elimination rate of the drug or its metabolite;  $Q$ : distribution clearance between compartments;  $IC_{50}$ : 50% maximum inhibitory drug concentration;  $V_{max}$ : maximal parasite-killing rate constant;  $n$ : slope factor; AS: artesunate; DHA: dihydroartemisinin; AQ: amodiaquine; DEAQ: desethylamodiaquine.

<sup>a</sup>  $V_{max} = -0.5 \times \ln(1/PRR)$ , where PRR is the parasite reduction ratio.

**Table 2. Simulated scenarios.**

| <b>Scenario</b>                      | <b>AS treatment schedule</b> | <b>AQ treatment schedule</b> |
|--------------------------------------|------------------------------|------------------------------|
| 1 Baseline (fully adherent)          | Once daily for three days    | Once daily for three days    |
| 2 Omitting the third dose            | Once daily for two days      | Once daily for two days      |
| 3 Omitting the second and third dose | Single dose                  | Single dose                  |
| 4 Delaying doses for 12 hours        | At 0, 36, and 60 hours       | At 0, 36, and 60 hours       |
| 5 AQ monotherapy                     | –                            | Once daily for three days    |
| 6 AS monotherapy                     | Once daily for three days    | –                            |

Abbreviations: AQ: amodiaquine; AS: artesunate.

**Table 3. Simulated dosing regimens.**

|   | <b>Regimen</b>              | <b>AS dose</b> | <b>AQ dose</b> |
|---|-----------------------------|----------------|----------------|
| A | WHO target dose (2)         | 4 mg/kg        | 10 mg/kg       |
|   | <b>Weight-based</b>         |                |                |
| B | Study 1 – FDC (2)           |                |                |
|   | 4.5-8.9 kg                  | 25 mg          | 67.5 mg        |
|   | 9-17.9 kg                   | 50 mg          | 135 mg         |
|   | 18-35.9 kg                  | 100 mg         | 270 mg         |
|   | > 36 kg                     | 200 mg         | 540 mg         |
| C | Study 1 – co-blistered (2)  |                |                |
|   | 4.5-8.9 kg                  | 25 mg          | 76.5 mg        |
|   | 9-17.9 kg                   | 50 mg          | 153 mg         |
|   | 18-35.9 kg                  | 100 mg         | 306 mg         |
|   | > 36 kg                     | 200 mg         | 612 mg         |
|   | <b>Age-based</b>            |                |                |
| D | Study 2 – FDC (11)          |                |                |
|   | 6-11 month                  | 25 mg          | 67.5 mg        |
|   | 1-5 years                   | 50 mg          | 135 mg         |
|   | 6-13 years                  | 100 mg         | 270 mg         |
|   | ≥ 14 years                  | 200 mg         | 540 mg         |
| E | Study 3 – co-blistered (59) |                |                |
|   | < 1 year                    | 25 mg          | 76.5 mg        |
|   | 1-5 years                   | 50 mg          | 153 mg         |
|   | 6-12 years                  | 100 mg         | 306 mg         |
|   | >13years                    | 200 mg         | 612 mg         |
| F | Study 4 – FDC (60)          |                |                |
|   | 1-5 years                   | 50 mg          | 135 mg         |
|   | 6-13 years                  | 100 mg         | 270 mg         |
|   | ≥ 14 years                  | 200 mg         | 540 mg         |
| G | Study 4 – co-blistered (60) |                |                |
|   | 1-5 years                   | 50 mg          | 153 mg         |
|   | 6-10 years                  | 100 mg         | 306 mg         |
|   | 11-15 years                 | 150 mg         | 459 mg         |

Abbreviations: WHO: World Health Organization; AS: artesunate; AQ: amodiaquine; FDC: fixed-dose combination



**Table 4. Cure rates for different combinations of dosing regimens, adherence scenarios and adherence levels.** Details of scenarios and regimens can be found in **Table 2** and **Table 3**

respectively. Follow-up time was 28 days. The adherence level column indicates the proportion of simulated individuals (n=10,000) following the recommended dosing for each regimen according to scenario 1 (i.e. once daily dosing for three days). For example, when simulating scenario 2 with regimen A at an adherence level of 77%, means 77% of patients (n=7,700) followed scenario 1 with regimen A, and the remaining 23% of patients (n=2,300) missed the last dose of treatment according to scenario 2 with regimen A.

| Scenario | Regimen | Adherence level to scenario 1 [%] | Cure rate [%] per region |        |       |               | Safety* |
|----------|---------|-----------------------------------|--------------------------|--------|-------|---------------|---------|
|          |         |                                   | Global                   | Africa | Asia  | Latin America |         |
| 1        | A       | 100                               | 96.35                    | -      | -     | -             | No      |
|          | B       | 100                               | 96.59                    | 96.27  | 96.64 | 96.28         | Yes     |
|          | C       | 100                               | 97.19                    | 96.99  | 97.28 | 96.93         | Yes     |
|          | D       | 100                               | 97.21                    | 96.42  | 97.44 | 95.50         | Yes     |
|          | E       | 100                               | 97.90                    | 97.30  | 98.12 | 96.47         | Yes     |
|          | F       | 100                               | 97.46                    | 96.73  | 97.71 | 95.85         | Yes     |
|          | G       | 100                               | 97.16                    | 96.24  | 97.44 | 95.31         | Yes     |
| 2        | A       | 0                                 | 80.56                    | -      | -     | -             | No      |
|          |         | 50                                | 90.08                    | -      | -     | -             | No      |
|          |         | 60                                | 90.83                    | -      | -     | -             | No      |
|          |         | 77                                | 93.18                    | -      | -     | -             | No      |
|          |         | 80                                | 93.64                    | -      | -     | -             | No      |
|          |         | 85                                | 94.36                    | -      | -     | -             | No      |
|          | B       | 0                                 | 80.81                    | 79.95  | 81.04 | 79.03         | No      |
|          | C       | 0                                 | 83.22                    | 82.34  | 83.56 | 81.73         | No      |
|          | D       | 0                                 | 83.53                    | 81.04  | 84.56 | 76.81         | No      |
|          | E       | 0                                 | 86.12                    | 83.56  | 87.02 | 80.53         | No      |

|   |   |    |       |       |       |       |    |
|---|---|----|-------|-------|-------|-------|----|
|   | F | 0  | 84.64 | 79.03 | 85.52 | 78.12 | No |
|   | G | 0  | 83.34 | 81.73 | 84.28 | 77.03 | No |
| 3 |   | 0  | 22.91 | -     | -     | -     | No |
|   |   | 60 | 67.17 | -     | -     | -     | No |
|   | A | 77 | 79.42 | -     | -     | -     | No |
|   |   | 80 | 81.61 | -     | -     | -     | No |
|   |   | 85 | 85.28 | -     | -     | -     | No |
|   |   | 90 | 89.00 | -     | -     | -     | No |
|   | B | 0  | 25.48 | 24.51 | 25.79 | 23.31 | No |
|   | C | 0  | 29.34 | 28.40 | 30.17 | 27.56 | No |
|   | D | 0  | 30.00 | 25.78 | 31.33 | 21.61 | No |
|   | E | 0  | 34.86 | 30.70 | 36.52 | 26.58 | No |
|   | F | 0  | 31.35 | 27.05 | 32.64 | 22.76 | No |
|   | G | 0  | 30.95 | 26.88 | 32.42 | 22.86 | No |
| 4 | A | 0  | 96.30 | -     | -     | -     | No |
| 5 | A | 0  | 35.80 | -     | -     | -     | No |
| 6 | A | 0  | 22.88 | -     | -     | -     | No |

\* Indicates whether this combination of scenario and regimen was included in the safety assessment.

**Table 5 Dosing accuracy and predicted exposure depending on dosing regimen.** This table shows the percentage of patients from different regions receiving doses outside the therapeutic range when given one of the six regimens described in **Figure 3**, the drug dosage and predicted maximal plasma concentration of drug and its metabolites. Values of dosage and  $C_{max}$  are in medians.

|                  | OD AS<br>[%] | UD AS<br>[%] | OD AQ<br>[%] | UD AQ<br>[%] | AS dose<br>[mg/kg/<br>day] | AQ dose<br>[mg/kg/<br>day] | $C_{max}$ AS<br>[mg/dL] | $C_{max}$ DHA<br>[mg/dL] | $C_{max}$ AQ<br>[mg/dL] | $C_{max}$ DEAQ<br>[mg/dL] |
|------------------|--------------|--------------|--------------|--------------|----------------------------|----------------------------|-------------------------|--------------------------|-------------------------|---------------------------|
| <b>Regimen A</b> |              |              |              |              |                            |                            |                         |                          |                         |                           |
| Africa           | 0.0          | 0.0          | 0.0          | 0.0          | 4                          | 10                         | 0.5                     | 0.8                      | < 0.1                   | 0.3                       |
| Asia             | 0.0          | 0.0          | 0.0          | 0.0          | 4                          | 10                         | 0.5                     | 0.8                      | < 0.1                   | 0.3                       |
| Latin America    | 0.0          | 0.0          | 0.0          | 0.0          | 4                          | 10                         | 0.5                     | 0.8                      | < 0.1                   | 0.3                       |
| <b>Regimen B</b> |              |              |              |              |                            |                            |                         |                          |                         |                           |
| Africa           | 0.0          | 0.0          | 0.0          | 1.7          | 3.3                        | 8.9                        | 0.5                     | 0.7                      | < 0.1                   | 0.3                       |
| Asia             | 0.0          | 0.0          | 0.0          | 0.0          | 4.2                        | 11.3                       | 0.5                     | 0.8                      | < 0.1                   | 0.4                       |
| Latin America    | 0.0          | 0.0          | 0.0          | 3.2          | 3.8                        | 10.1                       | 0.5                     | 0.8                      | < 0.1                   | 0.4                       |
| <b>Regimen C</b> |              |              |              |              |                            |                            |                         |                          |                         |                           |
| Africa           | 0.0          | 0.0          | 13.8         | 0.4          | 3.9                        | 11.8                       | 0.5                     | 0.8                      | 0.1                     | 0.4                       |
| Asia             | 0.0          | 0.0          | 23.2         | 0.0          | 4.2                        | 12.8                       | 0.5                     | 0.8                      | 0.1                     | 0.4                       |
| Latin America    | 0.0          | 0.0          | 11.6         | 0.7          | 3.8                        | 11.5                       | 0.5                     | 0.8                      | < 0.1                   | 0.4                       |
| <b>Regimen D</b> |              |              |              |              |                            |                            |                         |                          |                         |                           |
| Africa           | 0.0          | 0.1          | 9.1          | 6.0          | 4.0                        | 10.7                       | 0.5                     | 0.8                      | < 0.1                   | 0.4                       |
| Asia             | 0.0          | 0.0          | 24.0         | 1.4          | 4.8                        | 13.0                       | 0.6                     | 1.0                      | 0.1                     | 0.4                       |
| Latin America    | 0.0          | 1.7          | 2.5          | 16.1         | 3.6                        | 9.6                        | 0.5                     | 0.7                      | < 0.1                   | 0.3                       |

| <b>Regimen E</b> |     |     |      |      |     |      |     |     |       |     |
|------------------|-----|-----|------|------|-----|------|-----|-----|-------|-----|
| Africa           | 0.0 | 0.0 | 23.8 | 1.2  | 4.1 | 12.4 | 0.5 | 0.8 | 0.1   | 0.4 |
| Asia             | 0.1 | 0.0 | 50.9 | 0.3  | 4.9 | 15.0 | 0.6 | 1.0 | 0.1   | 0.5 |
| Latin America    | 0.0 | 0.9 | 9.8  | 5.0  | 3.6 | 11.1 | 0.5 | 0.7 | < 0.1 | 0.4 |
| <b>Regimen F</b> |     |     |      |      |     |      |     |     |       |     |
| Africa           | 0.1 | 0.0 | 13.6 | 4.1  | 4.1 | 11.1 | 0.5 | 0.8 | < 0.1 | 0.4 |
| Asia             | 0.2 | 0.0 | 29.8 | 0.7  | 5.0 | 13.4 | 0.6 | 1.0 | 0.1   | 0.5 |
| Latin America    | 0.0 | 1.1 | 5.2  | 12.5 | 3.7 | 10.0 | 0.5 | 0.7 | < 0.1 | 0.3 |
| <b>Regimen G</b> |     |     |      |      |     |      |     |     |       |     |
| Africa           | 0.1 | 1.2 | 19.4 | 9.1  | 3.6 | 10.9 | 0.5 | 0.7 | < 0.1 | 0.4 |
| Asia             | 0.2 | 0.0 | 32.2 | 0.9  | 4.2 | 12.8 | 0.6 | 0.8 | 0.1   | 0.5 |
| Latin America    | 0.0 | 3.0 | 8.1  | 16.6 | 3.1 | 9.5  | 0.4 | 0.6 | < 0.1 | 0.3 |

Abbreviations: AS: artesunate; AQ: amodiaquine; DHA: dihydroartemisinin; DEAQ: desethylamodiaquine;  $C_{max}$ : maximal concentration of drug; OD: over-dosed; UD: under-dose

**Figure 1**

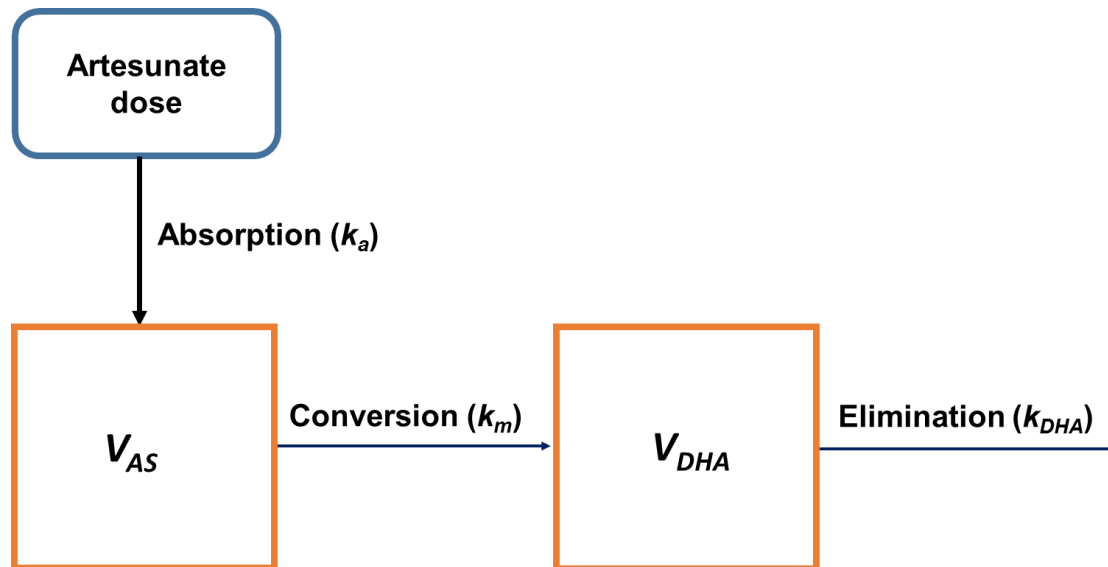

Figure 2

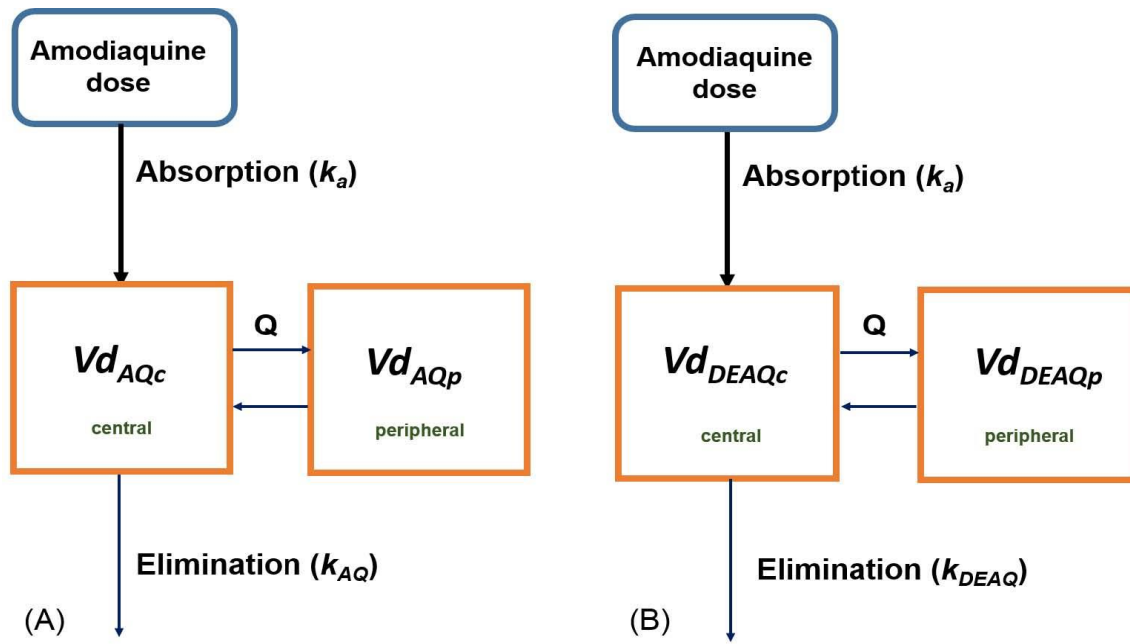

**Figure 3**

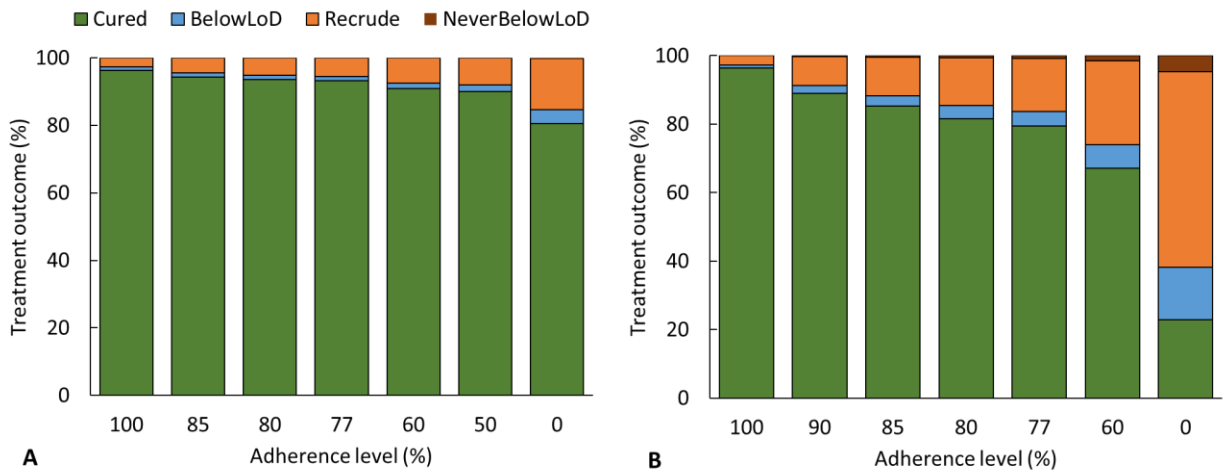

**Figure 4**

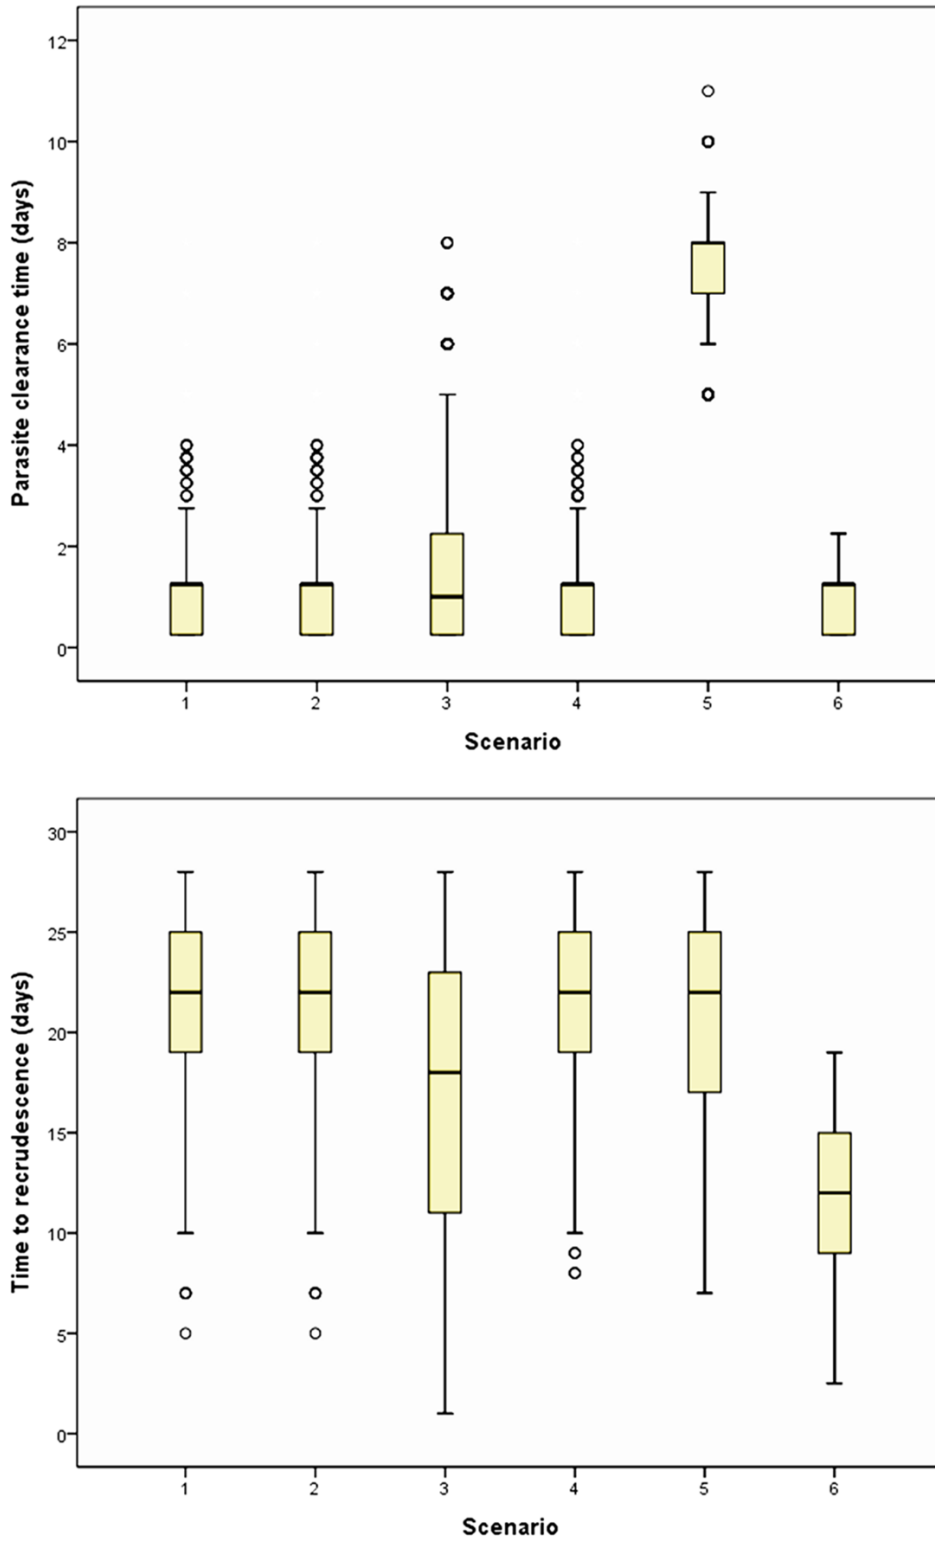



**Figure 5**

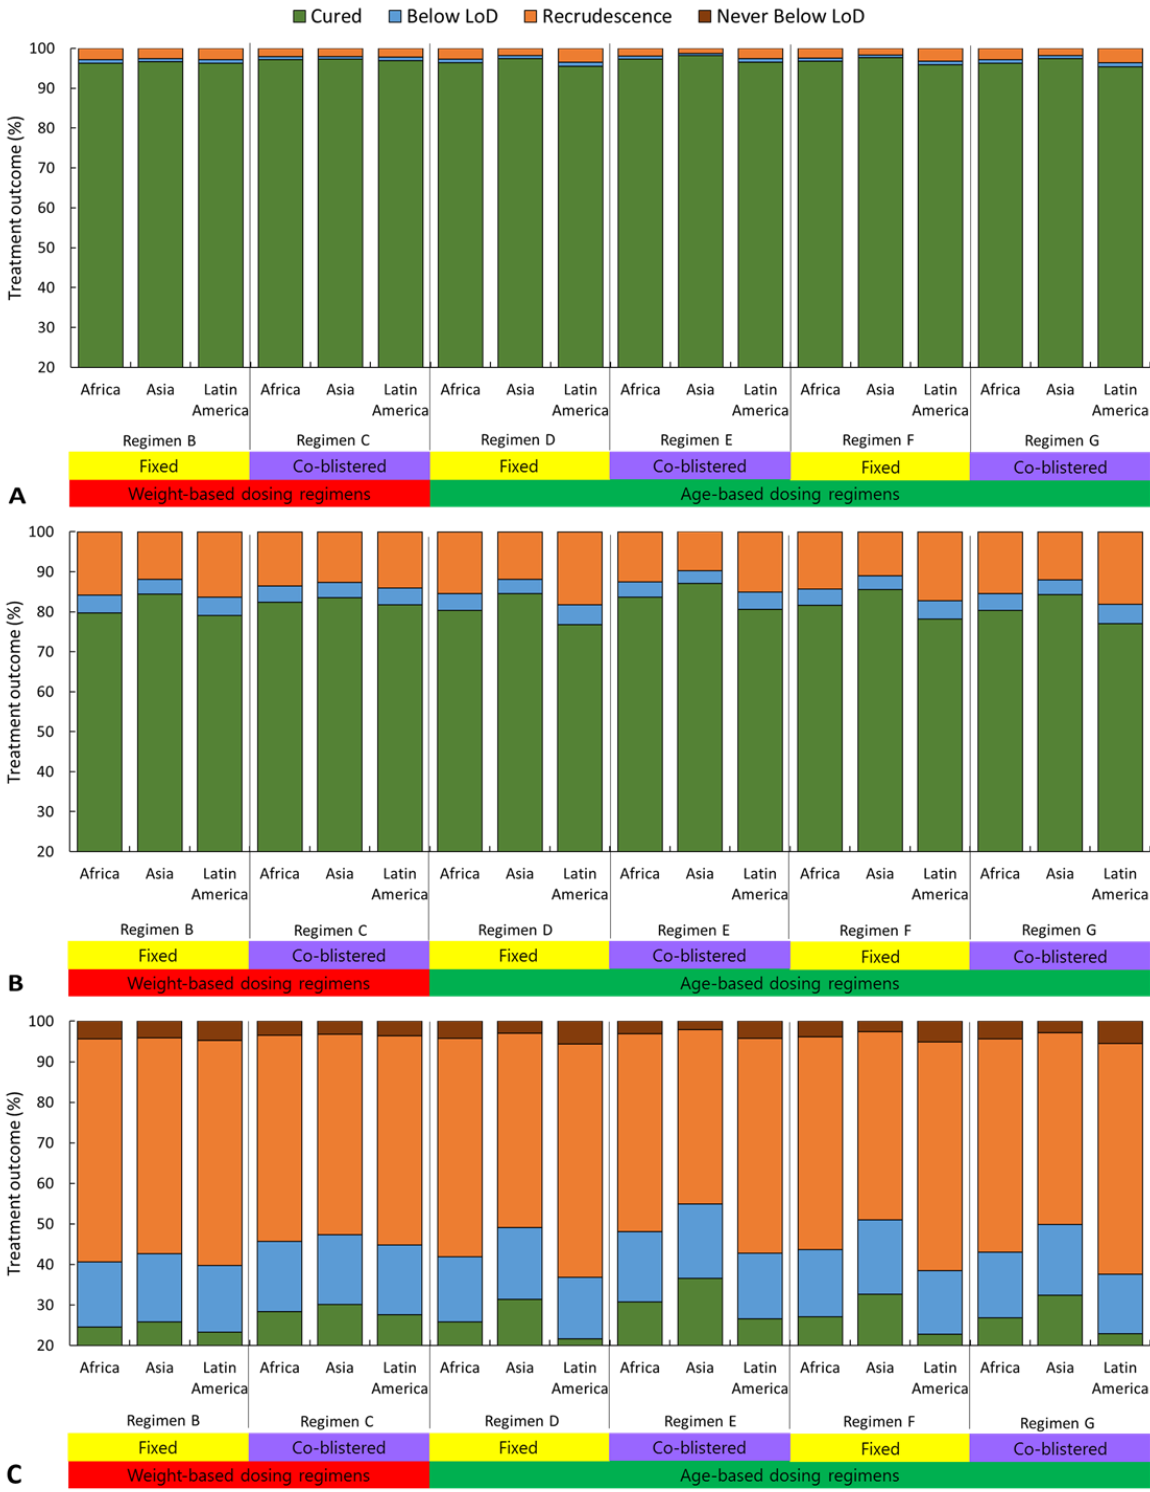

**Figure 6**

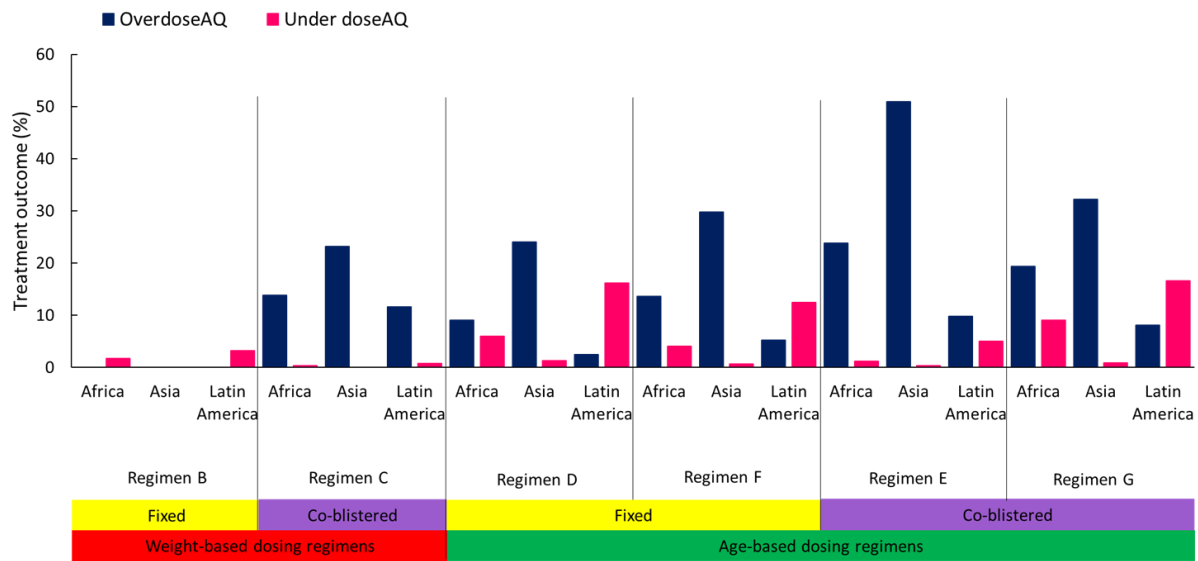

**Figure 7**

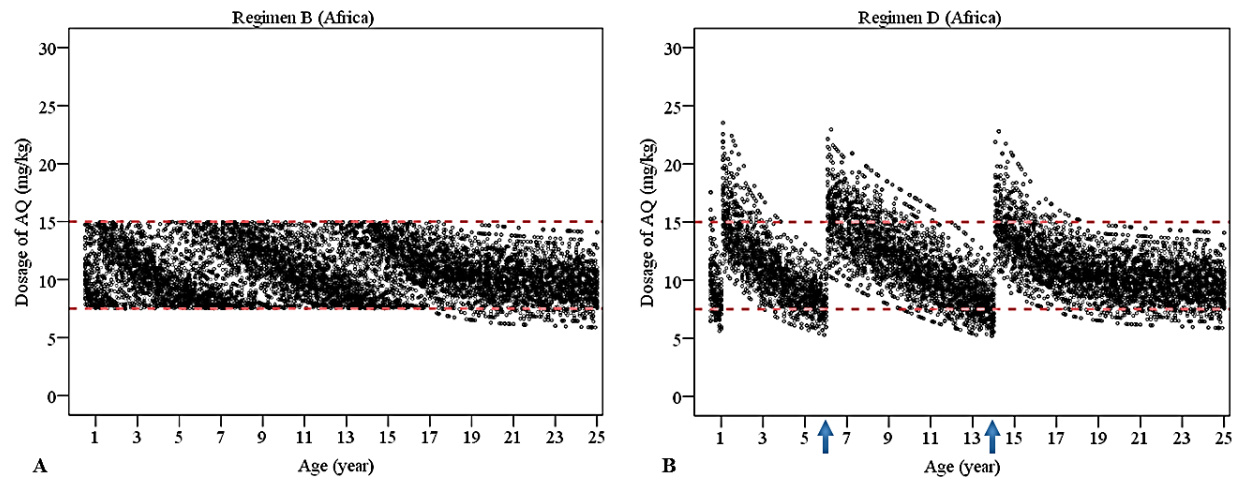

Source: https://www.biorxiv.org/content/10.1101/567008v1.full.pdf
